# Supplementary material for: Effect of Dietary Supplemented with Mulberry Leaf Powder on Growth Performance, Serum Metabolites, Antioxidant Property and Intestinal Health of Weaned Piglets
Source: MDPI journal article supplement (doi:10.3390/antiox12020307), 2023-01-28
Supplement: s1 [file s1]

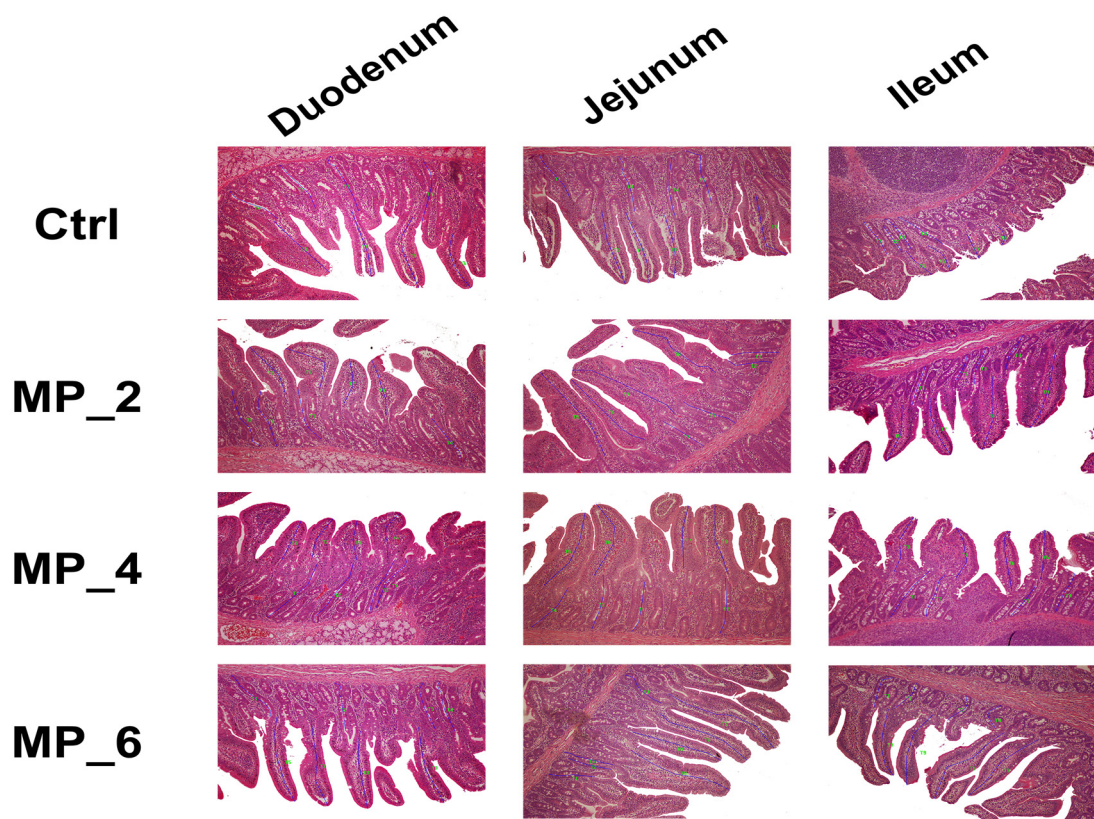

**Figure S1.** The photomicrograph of intestinal morphology in piglets dietary supplementation of mulberry leaf powder with varying levels. Ctrl, basal diet with 0% MP; MP\_2, MP\_4, MP\_6, the basal diet supplemented with 2%, 4% and 6% MP, respectively. The images were visualized at 100x magnification and four pairs of villi and crypt were highlighted with blue color.  $N = 3$ .

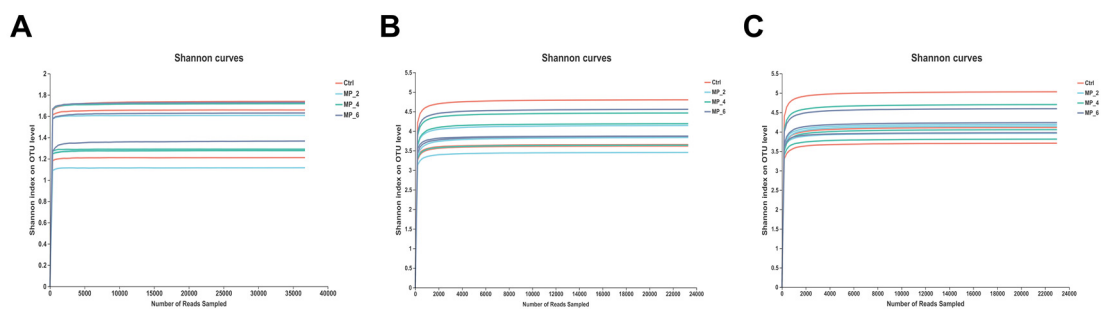

**Figure S2.** The rarefaction curves of ileum (A), cecum (B) and colon (C) at OTU level in piglets dietary supplementation of mulberry leaf powder with varying levels. All samples of ileum, cecum and colon indicated that the diversity indices increased sharply and eventually flatten, suggesting that the sequencing data were substantial enough for reflecting the majority of microbial diversity information in the samples.

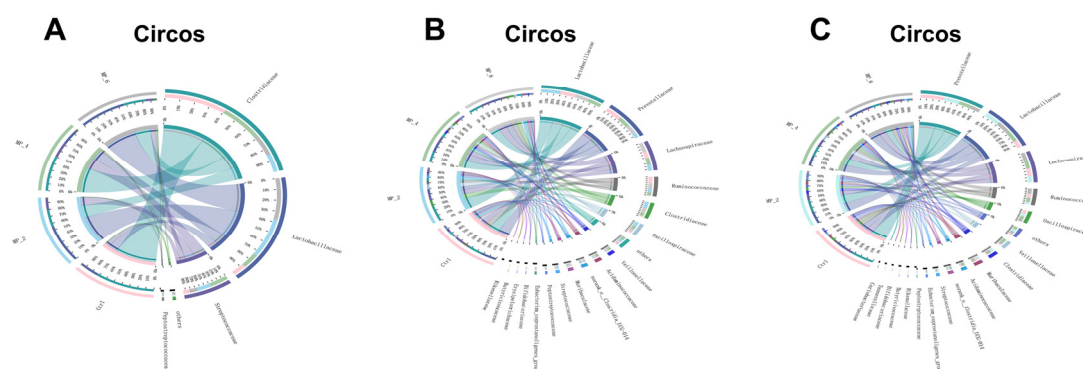

**Figure S3:** The Circos diagram at family level in ileum(A), cecum (B) and colon (C) of piglets. Ctrl, MP\_2, MP\_4 and MP\_6, basal diets containing 0%, 2%, 4% and 6% of MP, respectively. N=3.

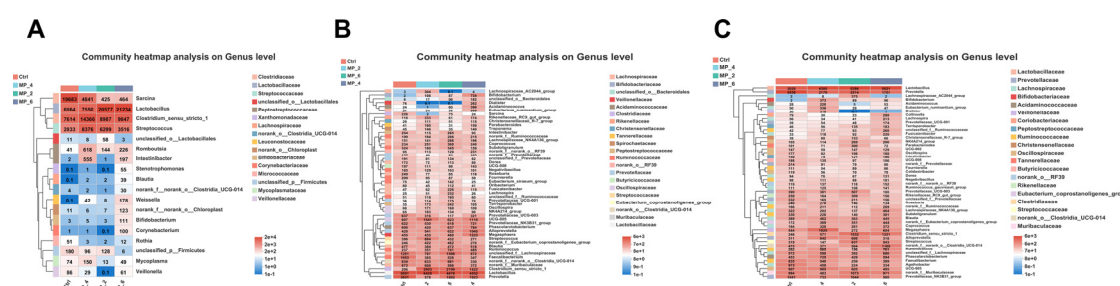

**Figure S4:** The heatmap analysis at genus level in ileum (A), cecum (B) and colon (C) of piglets. Ctrl, MP\_2, MP\_4 and MP\_6, basal diets containing 0%, 2%, 4% and 6% of MP, respectively. N=3.

**Table S1.** Nutrient composition of mulberry leaf powder (% , as-fed basis)

| Item                    | Mulberry powder |
|-------------------------|-----------------|
| Dry matter              | 94.23           |
| Crude protein           | 19.64           |
| Ether extract           | 5.20            |
| Crude fiber             | 34.44           |
| Neutral detergent fiber | 34.90           |
| Acid detergent fiber    | 21.60           |
| Organic matter          | 89.97           |
| Gross energy            | 17.39           |
| Calcium                 | 1.64            |
| Phosphorus              | 0.26            |
| Aspartic acid           | 1.12            |
| Glutamic acid           | 1.35            |
| Threonine               | 0.51            |
| Serine                  | 0.46            |
| Proline                 | 0.49            |

|               |      |
|---------------|------|
| Glycine       | 0.60 |
| Alanine       | 0.66 |
| Cysteine      | 0.07 |
| Valine        | 0.64 |
| Methionine    | 0.03 |
| Isoleucine    | 0.51 |
| Leucine       | 0.95 |
| Tyrosine      | 0.32 |
| Phenylalanine | 0.58 |
| Histidine     | 0.54 |
| Lysine        | 0.80 |
| Arginine      | 0.55 |
| Tryptophan    | 0.10 |

**Table S2.** Composition and nutrient levels of basal diet (as-fed basis, %)

| Item                                   | Ctrl   | 2% MP  | 4% MP  | 6% MP  |
|----------------------------------------|--------|--------|--------|--------|
| Corn, 8.2% CP                          | 64.11  | 62.43  | 60.72  | 59.04  |
| Soybean meal, 46% CP                   | 9.80   | 9.50   | 9.20   | 8.90   |
| Fish meal, 64.7% CP                    | 2.50   | 2.50   | 2.50   | 2.50   |
| Mulberry leaf powder                   | 0.00   | 2.00   | 4.00   | 6.00   |
| Peanut meal, 50.5% CP                  | 3.00   | 3.00   | 3.00   | 3.00   |
| Corn gluten meal, 55.6% CP             | 5.00   | 5.00   | 5.00   | 5.00   |
| Whey powder, 3.8% CP                   | 10.00  | 10.00  | 10.00  | 10.00  |
| Soybean oil                            | 1.00   | 1.00   | 1.00   | 1.00   |
| Limestone                              | 0.80   | 0.80   | 0.80   | 0.80   |
| Dicalcium phosphate                    | 0.85   | 0.85   | 0.87   | 0.87   |
| Salt                                   | 0.33   | 0.33   | 0.33   | 0.33   |
| L-lysine HCl, 78%                      | 0.72   | 0.70   | 0.69   | 0.67   |
| L-methionine, 98%                      | 0.31   | 0.32   | 0.32   | 0.33   |
| Threonine, 98%                         | 0.33   | 0.32   | 0.32   | 0.31   |
| Tryptophan, 98%                        | 0.12   | 0.12   | 0.12   | 0.12   |
| Valine                                 | 0.18   | 0.18   | 0.18   | 0.18   |
| Zinc oxide                             | 0.20   | 0.20   | 0.20   | 0.20   |
| Chromic oxide                          | 0.25   | 0.25   | 0.25   | 0.25   |
| Non-antibiotic premix <sup>1</sup>     | 0.50   | 0.50   | 0.50   | 0.50   |
| Total                                  | 100.00 | 100.00 | 100.00 | 100.00 |
| <b>Nutritional levels (calculated)</b> |        |        |        |        |
| Digestive energy, MJ/kg                | 14.85  | 14.86  | 14.87  | 14.88  |
| Crude protein                          | 17.78  | 17.71  | 17.64  | 17.56  |
| Digestible lysine                      | 1.31   | 1.31   | 1.31   | 1.31   |
| Digestible methionine                  | 0.63   | 0.63   | 0.63   | 0.63   |
| Digestible threonine                   | 0.94   | 0.94   | 0.94   | 0.94   |

|                                      |       |       |       |       |
|--------------------------------------|-------|-------|-------|-------|
| Digestible tryptophan                | 0.27  | 0.27  | 0.27  | 0.27  |
| Calcium                              | 0.76  | 0.76  | 0.76  | 0.76  |
| Total phosphorus                     | 0.57  | 0.57  | 0.57  | 0.57  |
| <b>Nutritional levels (analyzed)</b> |       |       |       |       |
| Gross energy, MJ/kg                  | 16.26 | 16.17 | 16.25 | 16.20 |
| Crude protein                        | 18.08 | 17.81 | 17.75 | 17.73 |
| Ether extract                        | 3.10  | 3.08  | 3.15  | 3.39  |
| Dry matter                           | 88.66 | 88.36 | 88.67 | 88.88 |
| Neutral detergent fiber              | 8.92  | 9.76  | 12.51 | 12.65 |
| Acid detergent fiber                 | 2.57  | 3.75  | 3.82  | 5.22  |
| Organic matter                       | 94.90 | 94.80 | 94.80 | 94.30 |

CP, curde protein

<sup>1</sup> Non-antibiotic premix for per kilogram diet included: vitamin A, 12,000 IU; vitamin D<sub>3</sub>, 2000 IU; vitamin E, 24 IU; vitamin K<sub>3</sub>, 2.0 mg; vitamin B<sub>1</sub>, 2.0 mg; riboflavin, 6.0 mg; vitamin B<sub>6</sub>, 3 mg; vitamin B<sub>12</sub>, 24 µg; nicotinic acid, 30 mg; pantothenic acid, 20 mg; folic acid, 3.6 mg; biotin, 0.1 mg; choline chloride, 0.4 mg; iron (from FeSO<sub>4</sub>·7H<sub>2</sub>O), 96 mg; copper (from CuSO<sub>4</sub>·5H<sub>2</sub>O), 8.0 mg; zinc (ZnSO<sub>4</sub>·H<sub>2</sub>O), 120 mg; manganese (MnSO<sub>4</sub>·H<sub>2</sub>O), 40 mg; iodine (from KI), 0.56 mg; selenium (from Na<sub>2</sub>SeO<sub>3</sub>), 0.4 mg.

**Table S3.** Primer sequences of housekeeping and target genes concerned with intestinal barrier function.

| Item             | Sequences (5' to 3')        | Base | Length (bp) | T <sub>m</sub> (°C) |
|------------------|-----------------------------|------|-------------|---------------------|
| <i>occludin</i>  | F: ATGCTTTCTCAGCCAGCGTA     | 20   | 176         | 60                  |
|                  | R: AAGGTTCCATAGCCTCGGTC     | 20   |             |                     |
| <i>claudin-1</i> | F: CAAAACCTTCGCCTTCCAG      | 19   | 293         | 60                  |
|                  | R: TCCCCACATTTCGAGATGATTAC  | 22   |             |                     |
| <i>ZO-1</i>      | F: GAGGATGGTCACACCGTGGT     | 20   | 169         | 60                  |
|                  | R: GGAGGATGCTGTTGTCTCGG     | 20   |             |                     |
| <i>mucin-2</i>   | F: CGGCTCTCCAGTCTACTCGTCTAA | 24   | 204         | 60                  |
|                  | R: TGGTTGTCGGGCAAGTTGATGA   | 22   |             |                     |
| <i>β-actin</i>   | F: TACGCCAACACGGTGCTGTC     | 20   | 207         | 60                  |
|                  | R: GTACTCCTGCTTGCTGATCCACAT | 25   |             |                     |

F, forward primer; R, Reverse primer

ZO-1 = zonula occludens-1
